# Supplementary material
Source: publisher figshare collection journal article supplement (https://gsajournals.figshare.com/ndownloader/files/17431304)
Supplement: Supplementary file 1 [file 17431304]

ATGID	R.gene.names	chr	Col.Start	Col.End	Col.Length	Strand	TAIR.annotation	R.locus.structure	R.loci.members	Ler.locus.structure	Ler.copies	Ler.chr	Ler.start	Ler.end	Ler.length	matching
AT1G10920.1	LOV1	1	3644420	3647768	3348	REVERSE	NB-ARC	singleton	1	singleton	1	1	3675172	3678394	3222	Y
AT1G12210.1		1	4140948	4143605	2657	FORWARD	CNL	tandem	2	tandem	2	1	4173824	4177904	4080	Y
AT1G12220.1	RPS5	1	4144935	4147817	2882	FORWARD	CNL	tandem	2	deleted	0	NA	NA	NA	NA	N
AT1G12280.1	SUMM2	1	4174875	4177559	2684	REVERSE	NB-ARC	tandem	2	tandem	2	1	4208706	4211541	2835	Y
AT1G12290.1		1	4178359	4181247	2888	REVERSE	CNL	tandem	2	tandem	2	1	4211797	4216331	4534	Y
AT1G15890.1		1	5461317	5464223	2906	FORWARD	CNL	singleton	1	deleted	0	NA	NA	NA	NA	N
AT1G17600.1		1	6052936	6056664	3728	REVERSE	TNL	tandem inverted	3	tandem inverted	3	1	6074773	6078710	3937	Y
AT1G17610.1		1	6056895	6058357	1462	FORWARD	TIR-NBS	tandem inverted	3	tandem inverted	3	1	6078825	6080193	1368	Y
AT1G17615.1		1	6059441	6060667	1226	FORWARD	TIR-NBS	tandem inverted	3	tandem inverted	3	1	6080385	6082892	2507	Y
AT1G27170.1		1	9434559	9439417	4858	FORWARD	transmembrane receptors	tandem	2	singleton	1	1	9355040	9360113	5073	N
AT1G27180.1		1	9439859	9446106	6247	FORWARD	TNL	tandem	2	deleted	0	NA	NA	NA	NA	N
AT1G31540.2	RAC1	1	11288452	11293753	5301	REVERSE	TNL	singleton	1	singleton	1	1	11233715	11239068	5353	Y
AT1G33560.1	ADR1	1	12168768	12172005	3237	FORWARD	CNL	singleton	1	singleton	1	1	12102932	12105956	3024	Y
AT1G47370.1		1	17365898	17368703	2805	REVERSE	TIR.family	singleton	1	singleton	1	1	16423576	16425630	2054	Y
AT1G50180.1		1	18584235	18587136	2901	FORWARD	NB-ARC	singleton	1	tandem	2	1	17621113	17624572	3459	N
AT1G51270.3		1	19007510	19011272	3762	FORWARD	transmembrane receptors	singleton	1	tandem	2	1	18028904	18032814	3910	N
AT1G51480.1		1	19090847	19094306	3459	REVERSE	CNL	singleton	1	singleton	1	1	18103126	18107149	4023	Y
AT1G52660.1		1	19613475	19614796	1321	FORWARD	P-loop.protein	singleton	1	singleton	1	1	18605965	18607484	1519	Y
AT1G52900.1		1	19702211	19702916	705	REVERSE	TIR.family	singleton	1	singleton	1	1	18697190	18698010	820	Y
AT1G53350.1		1	19903899	19907515	3616	FORWARD	CNL	singleton	1	singleton	1	1	18886424	18889658	3234	Y
AT1G56510.1	WRR4	1	21167589	21173632	6043	FORWARD	TNL	tandem inverted	3	complex	4	1	20161754	20166575	4821	N
AT1G56520.2		1	21174664	21178974	4310	REVERSE	TNL	tandem inverted	3	complex	4	1	20168719	20171799	3080	N
AT1G56540.1		1	21181664	21185306	3642	FORWARD	TNL	tandem inverted	3	complex	4	1	20187074	20191081	4007	N
AT1G57650.1		1	21351291	21354311	3020	FORWARD	other	inverted	2	inverted	2	1	20351562	20353868	2306	Y
AT1G57670.1		1	21357169	21359872	2703	REVERSE	TIR.family	inverted	2	inverted	2	1	20357199	20359807	2608	Y
AT1G57830.1		1	21420309	21420803	494	FORWARD	TIR.family	tandem	2	singleton	1	1	20420242	20423288	3046	N
AT1G57850.1		1	21426690	21427349	659	FORWARD	TIR.family	tandem	2	deleted	0	NA	NA	NA	NA	N
AT1G58390.1		1	21690962	21694447	3485	REVERSE	CNL	tandem	3	tandem	2	1	20674651	20679394	4743	Y
AT1G58400.1		1	21696165	21699118	2953	REVERSE	CNL	tandem	3	tandem	2	1	20680277	20682814	2537	Y
AT1G58410.1		1	21701185	21704255	3070	REVERSE	CNL	tandem	3	deleted	0	NA	NA	NA	NA	N
AT1G58602.1	RPP7	1	21746373	21764969	18596	FORWARD	NB-LRR	complex	5	complex	5	1	20746709	20752778	6069	Y
AT1G58807.1		1	21780185	21784296	4111	FORWARD	CNL	complex	5	complex	5	1	20743569	20744743	1174	Y
AT1G58848.1		1	21791783	21797050	5267	FORWARD	CNL	complex	5	complex	5	1	20742009	20743483	1474	Y
AT1G59124.1		1	21816443	21820572	4129	FORWARD	CNL	complex	5	complex	5	1	20743569	20744743	1174	Y
AT1G59218.1		1	21828033	21832708	4675	FORWARD	CNL	complex	5	deleted	0	NA	NA	NA	NA	N
AT1G59620.1	CW9	1	21902284	21905685	3401	FORWARD	CNL	singleton	1	singleton	1	1	20816953	20820411	3458	Y
AT1G59780.1		1	21993581	21997691	4110	REVERSE	NB-ARC	singleton	1	singleton	1	1	20916050	20920408	4358	Y
AT1G60320.1		1	22235091	22235606	515	FORWARD	TIR.family	singleton	1	deleted	0	NA	NA	NA	NA	N
AT1G61105.1		1	22513585	22514492	907	REVERSE	TIR.family	singleton	1	singleton	1	1	21422613	21423680	1067	Y
AT1G61180.2		1	22551345	22554649	3304	FORWARD	NB-LRR	tandem	2	deleted	0	NA	NA	NA	NA	N
AT1G61190.1	RPP39	1	22557602	22560687	3085	FORWARD	NB-LRR	tandem	2	singleton	1	1	21474245	21477491	3246	N
AT1G61300.1		1	22607466	22610273	2807	REVERSE	NB-LRR	tandem	2	inverted	2	1	21468565	21471875	3310	N
AT1G61310.1		1	22613063	22615943	2880	REVERSE	NB-LRR	tandem	2	inverted	2	1	21533298	21534401	1103	N
AT1G62630.1		1	23185912	23188593	2681	FORWARD	CNL	singleton	1	singleton	1	1	22097424	22100613	3189	Y
AT1G63350.1	HRG4	1	23494935	23497631	2696	REVERSE	CNL	tandem	2	tandem	2	1	22426454	22427490	1036	Y
AT1G63360.1	HRG5	1	23499515	23502169	2654	REVERSE	CNL	tandem	2	tandem	2	1	22430582	22434000	3418	Y
AT1G63730.1		1	23641770	23645132	3362	FORWARD	TNL	tandem	3	tandem	3	1	22572422	22577406	4984	Y
AT1G63740.1		1	23645429	23648973	3544	FORWARD	TNL	tandem	3	tandem	3	1	22577462	22581686	4224	Y
AT1G63750.3	HRG6	1	23650848	23655359	4511	FORWARD	TNL	tandem	3	tandem	3	1	22583092	22587307	4215	Y
AT1G63860.1		1	23701484	23706005	4521	REVERSE	TNL	tandem	3	singleton	1	1	22632713	22637637	4924	N
AT1G63870.1		1	23707131	23711901	4770	REVERSE	TNL	tandem	3	deleted	0	NA	NA	NA	NA	N
AT1G63880.1		1	23712276	23716124	3848	REVERSE	TNL	tandem	3	deleted	0	NA	NA	NA	NA	N
AT1G64070.1	RLM1	1	23779949	23783449	3500	FORWARD	TNL	singleton	1	singleton	1	1	22720792	22724579	3787	Y
AT1G65390.1		1	24292478	24294631	2153	FORWARD	Phloem.protein	singleton	1	singleton	1	1	23233829	23235874	2045	Y
AT1G65850.2	HRG1	1	24494678	24498542	3864	FORWARD	TNL	singleton	1	singleton	1	1	23431886	23435854	3968	Y
AT1G66090.1		1	24602146	24604763	2617	FORWARD	TIR-NBS	singleton	1	singleton	1	1	23537378	23539861	2483	Y
AT1G69550.1		1	26148021	26153555	5534	REVERSE	TNL	singleton	1	deleted	0	NA	NA	NA	NA	N
AT1G72840.2		1	27409237	27413851	4614	REVERSE	TNL	complex	11	complex	11	1	26341647	26346011	4364	Y
AT1G72850.1		1	27413971	27415335	1364	FORWARD	TIR-NBS	complex	11	complex	11	1	26346166	26347889	1723	Y
AT1G72860.1		1	27416228	27420778	4550	REVERSE	TNL	complex	11	complex	11	1	26348494	26353221	4727	Y
AT1G72870.1		1	27421023	27423184	2161	FORWARD	TIR-NBS	complex	11	complex	11	1	26353326	26355540	2214	Y
AT1G72890.2		1	27429916	27431960	2044	FORWARD	TIR-NBS	complex	11	complex	11	1	26361346	26363470	2124	Y
AT1G72900.1		1	27432195	27433782	1587	FORWARD	TIR.family	complex	11	complex	11	1	26363686	26365259	1573	Y
AT1G72910.1		1	27435614	27437144	1530	FORWARD	TIR.family	complex	11	complex	11	1	26367096	26368580	1484	Y
AT1G72920.1		1	27437928	27439091	1163	FORWARD	TIR.family	complex	11	complex	11	1	26369396	26370477	1081	Y
AT1G72930.1		1	27439452	27440464	1012	FORWARD	TIR.family	complex	11	complex	11	1	26370946	26371899	953	Y
AT1G72940.1		1	27442238	27443856	1618	FORWARD	TIR.family	complex	11	complex	11	1	26373676	26375183	1507	Y
AT1G72950.1		1	27444585	27445980	1395	FORWARD	TIR-NBS	complex	11	complex	11	1	26375926	26377445	1519	Y
AT2G03030.1		2	889764	890520	756	FORWARD	TIR.family	singleton	1	inverted	2	2	818390	820760	2370	N
AT2G03300.1		2	1003468	1004222	754	REVERSE	TIR.family	singleton	1	deleted	0	NA	NA	NA	NA	N
AT2G14080.1		2	5925186	5929600	4414	FORWARD	TNL	singleton	1	singleton	1	2	5310441	5315545	5104	Y
AT2G16870.1		2	7308077	7311686	3609	REVERSE	TNL	singleton	1	singleton	1	2	6635115	6638962	3847	Y
AT2G17050.1		2	7410835	7415610	4775	REVERSE	TNL	inverted	2	inverted	2	2	6751895	6759869	7974	Y
AT2G17060.1		2	7422411	7426877	4466	FORWARD	TNL	inverted	2	inverted	2	2	6763524	6768271	4747	Y
AT2G20142.1		2	8695374	8696643	1269	FORWARD	TIR.family	singleton	1	singleton	1	2	8023627	8025057	1430	Y
AT2G32140.1		2	13655627	13657175	1548	REVERSE	transmembrane receptors	singleton	1	singleton	1	2	12978835	12980469	1634	Y
AT3G04210.1		3	1105963	1108069	2106	REVERSE	TIR-NBS	tandem	2	tandem	2	3	1107399	1109492	2093	Y
AT3G04220.1		3	1109118	1112188	3070	REVERSE	TNL	tandem	2	tandem	2	3	1110436	1113682	3246	Y
AT3G07040.1	RPM1	3	2225952	2229024	3072	REVERSE	NB-ARC	singleton	1	singleton	1	3	2244200	2247704	3504	Y
AT3G14460.1		3	4851990	4856264	4274	REVERSE	NB-LRR	inverted	2	inverted	2	3	4887545	4892112	4567	Y
AT3G14470.1		3	4857940	4861247	3307	FORWARD	NB-ARC	inverted	2	inverted	2	3	4892217	4896970	4753	Y
AT3G15700.1		3	5321136	5322376	1240	REVERSE	P-loop.protein	singleton	1	singleton	1	3	5369215	5371006	1791	Y
AT3G25510.1		3	9260838	9268797	7959	REVERSE	TNL	singleton	1	singleton	1	3	9317154	9325261	8107	Y
AT3G44400.1		3	16045954	16049668	3714	REVERSE	TNL	tandem	2	singleton	1	3	15225709	15227468	1759	N
AT3G44480.1	RPP1	3	16090564	16096359	5795	REVERSE	TNL	tandem	2	deleted	0	NA	NA	NA	NA	N
AT3G44630.3	DM2	3	16195984	16200595	4611	FORWARD	TNL	tandem	2	complex	8	3	15229299	15233794	4495	N
AT3G44670.1		3	16216950	16221617	4667	FORWARD	TNL	tandem	2	complex	8	3	15244549	15357216	112667	N
AT3G46530.1	RPP13	3	17130367	17133338	2971	REVERSE	NB-ARC	singleton	1	deleted	0	NA	NA	NA	NA	N
AT3G46710.1		3	17206489	17209032	2543	REVERSE	NB-ARC	tandem	2	tandem	2	3	16354836	16357615	2779	Y
AT3G46730.1		3	17213069	17215612	2543	REVERSE	NB-ARC	tandem	2	tandem	2	3	16361410	16364175	2765	Y
AT3G50950.2	ZAR1	3	18935714	18938685	2971	FORWARD	other	singleton	1	singleton	1	3	18126825	18129838	3013	Y
AT3G51560.1		3	19121808	19125913	4105	REVERSE	TNL	inverted	2	inverted	2	3	18313171	18317542	4371	Y
AT3G51570.1		3	19126358	19130456	4098	FORWARD	TNL	inverted	2	inverted	2	3	18317837	18322119	4282	Y
AT4G04110.1		4	1972591	1974014	1423	FORWARD	TIR.family	singleton	1	deleted	0	NA	NA	NA	NA	N
AT4G08450.1		4	5365610	5371101	5491	FORWARD	TNL	singleton	1	singleton	1	4	4675169	4685549	10380	Y
AT4G09360.1		4	5940186	5943280	3094	FORWARD	NB-ARC	tandem inverted	3	deleted	0	NA	NA	NA	NA	N
AT4G09420.1		4	5962181	5963791	1610	REVERSE	TIR-NBS	tandem inverted	3	deleted	0	NA	NA	NA	NA	N
AT4G09430.1		4	5970932	5975375	4443	FORWARD	TNL	tandem inverted	3	deleted	0	NA	NA	NA	NA	N
AT4G10780.1		4	6634779	6637457	2678	REVERSE	NB-LRR	singleton	1	deleted	0	NA	NA	NA	NA	N
AT4G11170.1	RMG1	4	6811127	6817130	6003	FORWARD	TNL	inverted	2	inverted	2	4	6101090	6107499	6409	Y
AT4G11340.1		4	6894208	6899130	4922	REVERSE	TNL	inverted	2	inverted	2	4	6194343	6195005	662	Y
AT4G12010.1		4	7197211	7201393	4182	REVERSE	TNL	inverted	2	inverted	2	4	6509019	6513295	4276	Y
AT4G12020.2		4	7201656	7209648	7992	FORWARD	other	inverted	2	inverted	2	4	6513420	6521598	8178	Y
AT4G14370.1		4	8279641	8283263	3622	REVERSE	TNL	singleton	1	singleton	1	4	7680139	7683798	3659	Y
AT4G16860.1	RPP4	4	9488466	9495816	7350	REVERSE	TNL	complex	8	complex	6	4	8939300	8943031	3731	Y
AT4G16890.1	SNC1	4	9500506	9505455	4949	REVERSE	TNL	complex	8	deleted	0	NA	NA	NA	NA	N
AT4G16900.1		4	9511859	9516541	4682	REVERSE	TNL	complex	8	complex	6	4	8926196	8931021	4825	Y
AT4G16920.1		4	9519173	9525691	6518	REVERSE	TNL	complex	8	complex	6	4	8936138	8976510	40372	Y
AT4G16940.1		4	9533149	9537604	4455	REVERSE	TNL	complex	8	deleted	0	NA	NA	NA	NA	N
AT4G16950.1	RPP5	4	9538798	9544467	5669	REVERSE	TNL	complex	8	complex	6	4	8990417	8991671	1254	Y
AT4G16960.1		4	9546343	9551007	4664	REVERSE	TNL	complex	8	deleted	0	NA	NA	NA	NA	N
AT4G16990.2	RLM3	4	9560135	9565454	5319	FORWARD	TIR-NBS	complex	8	complex	6	4	9010986	9016399	5413	Y
AT4G19050.1		4	10439984	10444121	4137	REVERSE	NB-ARC	tandem	2	tandem	2	4	9872448	9876842	4394	Y
AT4G19060.1		4	10444916	10446300	1384	REVERSE	P-loop.protein	tandem	2	tandem	2	4	9877644	9880922	3278	Y
AT4G19500.1		4	10625659	10630395	4736	FORWARD	transmembrane receptors	tandem inverted	4	deleted	0	NA	NA	NA	NA	N
AT4G19510.1		4	10633685	10639001	5316	FORWARD	TNL	tandem inverted	4	deleted	0	NA	NA	NA	NA	N
AT4G19520.1		4	10639269	10647079	7810	REVERSE	TNL	tandem inverted	4	tandem inverted	3	4	10054025	10061829	7804	Y
AT4G19530.1		4	10651744	10657282	5538	FORWARD	TNL	tandem inverted	4	tandem inverted	3	4	10062924	10072512	9588	Y
AT4G19920.1		4	10797217	10798388	1171	REVERSE	TIR.family	singleton	1	singleton	1	4	10214241	10215535	1294	Y
AT4G23440.1		4	12237765	12240826	3061	FORWARD	TIR-NBS	inverted	2	inverted	2	4	11586832	11590998	4166	Y
AT4G23510.1		4	12267516	12270543	3027	REVERSE	TNL	inverted	2	inverted	2	4	11618147	11620844	2697	Y
AT4G26090.1	RPS2	4	13224338	13227872	3534	FORWARD	NB-ARC	singleton	1	singleton	1	4	12577086	12580150	3064	Y
AT4G27190.1		4	13620977	13623934	2957	REVERSE	NB-ARC	tandem	2	deleted	0	NA	NA	NA	NA	N
AT4G27220.1		4	13633953	13636712	2759	REVERSE	NB-ARC	tandem	2	deleted	0	NA	NA	NA	NA	N
AT4G33300.1		4	16051051	16056526	5475	REVERSE	other	singleton	1	singleton	1	4	15407292	15412719	5427	Y
AT4G36140.1		4	17098956	17104479	5523	REVERSE	TNL	inverted	2	inverted	2	4	16475516	16481198	5682	Y
AT4G36150.1		4	17104719	17108711	3992	FORWARD	TNL	inverted	2	inverted	2	4	16481403	16485472	4069	Y
AT5G04720.1		5	1360712	1363884	3172	FORWARD	other	singleton	1	singleton	1	5	1367048	1370291	3243	Y
AT5G05400.1		5	1597745	1600369	2624	REVERSE	NB-LRR	singleton	1	singleton	1	5	1607039	1610823	3784	Y
AT5G11250.1		5	3587978	3591960	3982	REVERSE	TNL	singleton	1	singleton	1	5	3619199	3624883	5684	Y
AT5G17680.1		5	5822999	5827153	4154	FORWARD	TNL	singleton	1	singleton	1	5	5834687	5839021	4334	Y
AT5G17880.1		5	5908874	5913099	4225	REVERSE	TNL	tandem inverted	3	deleted	0	NA	NA	NA	NA	N
AT5G17890.1		5	5916970	5923355	6385	FORWARD	other	tandem inverted	3	deleted	0	NA	NA	NA	NA	N
AT5G17970.1		5	5948999	5951619	2620	REVERSE	TNL	tandem inverted	3	singleton	1	5	5955718	5958512	2794	N
AT5G18350.1		5	6074069	6078569	4500	REVERSE	TNL	tandem	3	deleted	0	NA	NA	NA	NA	N
AT5G18360.1		5	6080049	6083027	2978	REVERSE	TNL	tandem	3	tandem	2	5	6079435	6084172	4737	Y
AT5G18370.1		5	6085036	6088926	3890	REVERSE	TNL	tandem	3	tandem	2	5	6082871	6088602	5731	Y
AT5G22690.1		5	7541271	7545182	3911	FORWARD	TNL	singleton	1	singleton	1	5	7532792	7536766	3974	Y
AT5G35450.1		5	13667686	13671184	3498	FORWARD	CNL	singleton	1	deleted	0	NA	NA	NA	NA	N
AT5G36930.2		5	14567622	14572630	5008	REVERSE	TNL	singleton	1	deleted	0	NA	NA	NA	NA	N
AT5G38340.1		5	15320507	15324061	3554	FORWARD	TNL	tandem	2	singleton	1	5	14633644	14637989	4345	N
AT5G38350.1		5	15328659	15331528	2869	FORWARD	NB-LRR	tandem	2	deleted	0	NA	NA	NA	NA	N
AT5G38850.1		5	15555156	15558732	3576	FORWARD	TNL	singleton	1	singleton	1	5	14869682	14874643	4961	Y
AT5G40060.1		5	16034576	16039096	4520	FORWARD	NB-LRR	tandem inverted	3	tandem inverted	3	5	15467333	15471920	4587	Y
AT5G40090.1		5	16041919	16043494	1575	REVERSE	TIR-NBS	tandem inverted	3	tandem inverted	3	5	15474759	15476568	1809	Y
AT5G40100.1		5	16043929	16047355	3426	FORWARD	TNL	tandem inverted	3	tandem inverted	3	5	15476753	15480596	3843	Y
AT5G40910.1		5	16395507	16399129	3622	FORWARD	TNL	singleton	1	singleton	1	5	15829747	15835649	5902	Y
AT5G41540.1		5	16612659	16616063	3404	REVERSE	TNL	tandem	2	tandem	2	5	16072377	16076079	3702	Y
AT5G41550.1	DM1	5	16617232	16620785	3553	REVERSE	TNL	tandem	2	tandem	2	5	16076528	16080659	4131	Y
AT5G41740.2	DM1	5	16688626	16693119	4493	FORWARD	TNL	tandem	2	tandem	2	5	16157434	16158794	1360	Y
AT5G41750.1		5	16693909	16698943	5034	FORWARD	TNL	tandem	2	tandem	2	5	16150334	16158794	8460	Y
AT5G43470.1	RPP8	5	17462611	17467448	4837	REVERSE	CNL	singleton	1	tandem	2	5	16879301	16888664	9363	N
AT5G43730.1		5	17560179	17562929	2750	FORWARD	CNL	tandem	2	tandem	2	5	16976686	16979918	3232	Y
AT5G43740.1		5	17564738	17568802	4064	FORWARD	CNL	tandem	2	tandem	2	5	16981246	16985358	4112	Y
AT5G44510.1	TAO1	5	17929673	17934188	4515	REVERSE	other	singleton	1	singleton	1	5	17332678	17337622	4944	Y
AT5G44870.1	TTR1	5	18114666	18118608	3942	FORWARD	TNL	complex	10	complex	7	5	17521433	17525580	4147	Y
AT5G44900.1		5	18135446	18136438	992	FORWARD	TIR.family	complex	10	complex	7	5	17528693	17531084	2391	Y
AT5G44910.1		5	18137354	18138235	881	FORWARD	TIR.family	complex	10	complex	7	5	17531223	17533187	1964	Y
AT5G44920.1		5	18138775	18140190	1415	FORWARD	TIR.family	complex	10	complex	7	5	17533423	17534747	1324	Y
AT5G45000.1		5	18165383	18167193	1810	FORWARD	TNL	complex	10	complex	7	5	17550305	17557075	6770	Y
AT5G45050.1	RRS1B	5	18176914	18181805	4891	REVERSE	TNL	complex	10	complex	7	5	17564772	17570000	5228	Y
AT5G45060.1	RPS4B	5	18182038	18186495	4457	FORWARD	TNL	complex	10	complex	7	5	17570095	17575216	5121	Y
AT5G45070.1		5	18187630	18189431	1801	REVERSE	Phloem.protein	complex	10	deleted	0	NA	NA	NA	NA	N
AT5G45080.1		5	18191575	18193207	1632	REVERSE	Phloem.protein	complex	10	deleted	0	NA	NA	NA	NA	N
AT5G45090.1		5	18202753	18205000	2247	REVERSE	Phloem.protein	complex	10	deleted	0	NA	NA	NA	NA	N
AT5G45200.1	HRG7	5	18283967	18290332	6365	REVERSE	TNL	complex	7	complex	4	5	17667052	17673600	6548	Y
AT5G45210.1	HRG8	5	18295521	18298434	2913	FORWARD	TNL	complex	7	complex	4	5	17678955	17682064	3109	Y
AT5G45220.1		5	18298926	18301069	2143	REVERSE	TNL	complex	7	deleted	0	NA	NA	NA	NA	N
AT5G45230.1		5	18302147	18308303	6156	REVERSE	TNL	complex	7	deleted	0	NA	NA	NA	NA	N
AT5G45240.1		5	18313706	18319089	5383	FORWARD	TNL	complex	7	deleted	0	NA	NA	NA	NA	N
AT5G45250.1	RPS4	5	18321914	18326022	4108	REVERSE	TNL	complex	7	complex	4	5	17709107	17713410	4303	Y
AT5G45260.1	RRS1	5	18326203	18332609	6406	FORWARD	TNL	complex	7	complex	4	5	17713505	17720469	6964	Y
AT5G45440.1		5	18412308	18413555	1247	REVERSE	P-loop.protein	tandem inverted	3	tandem	2	5	17828659	17849372	20713	N
AT5G45490.1		5	18431003	18432397	1394	FORWARD	P-loop.protein	tandem inverted	3	deleted	0	NA	NA	NA	NA	N
AT5G45510.1		5	18444657	18449446	4789	FORWARD	other	tandem inverted	3	deleted	0	NA	NA	NA	NA	N
AT5G46260.1	HRG2	5	18759102	18763358	4256	REVERSE	TNL	tandem	2	tandem	2	5	18186468	18190982	4514	Y
AT5G46270.1	HRG3	5	18764349	18769090	4741	REVERSE	TNL	tandem	2	tandem	2	5	18191887	18196462	4575	Y
AT5G46450.1		5	18835618	18839546	3928	FORWARD	TNL	complex	6	tandem	3	5	18262749	18267363	4614	N
AT5G46470.1	RPS6	5	18842701	18849741	7040	FORWARD	TNL	complex	6	tandem	3	5	18269759	18277400	7641	N
AT5G46490.2		5	18850776	18853843	3067	FORWARD	TNL	complex	6	tandem	3	5	18277959	18278786	827	N
AT5G46500.1		5	18856454	18857787	1333	FORWARD	other	complex	6	deleted	0	NA	NA	NA	NA	N
AT5G46510.1		5	18860451	18867013	6562	FORWARD	TNL	complex	6	deleted	0	NA	NA	NA	NA	N
AT5G46520.1		5	18867767	18872415	4648	FORWARD	TNL	complex	6	deleted	0	NA	NA	NA	NA	N
AT5G47250.1		5	19185794	19188745	2951	REVERSE	NB-ARC	tandem inverted	3	singleton	1	5	18585056	18588087	3031	N
AT5G47260.1		5	19189411	19192516	3105	FORWARD	other	tandem inverted	3	deleted	0	NA	NA	NA	NA	N
AT5G47280.1		5	19193157	19195559	2402	FORWARD	other	tandem inverted	3	deleted	0	NA	NA	NA	NA	N
AT5G48620.1		5	19716476	19721452	4976	FORWARD	CNL	singleton	1	singleton	1	5	19113468	19114232	764	Y
AT5G48770.1		5	19773277	19777242	3965	REVERSE	TNL	inverted	2	inverted	2	5	19172909	19177393	4484	Y
AT5G48780.1		5	19777468	19779604	2136	FORWARD	TIR-NBS	inverted	2	inverted	2	5	19177488	19179914	2426	Y
AT5G49140.1	HRG9	5	19919085	19923415	4330	REVERSE	TNL	singleton	1	singleton	1	5	19320131	19324555	4424	Y
AT5G51630.1		5	20970030	20974916	4886	FORWARD	TNL	singleton	1	singleton	1	5	20332140	20337754	5614	Y
AT5G56220.1		5	22754818	22757920	3102	FORWARD	P-loop.protein	singleton	1	singleton	1	5	22132914	22136908	3994	Y
AT5G58120.1		5	23517492	23521067	3575	FORWARD	TNL	singleton	1	singleton	1	5	22899860	22903408	3548	Y
AT5G63020.1		5	25283063	25286002	2939	REVERSE	CNL	singleton	1	singleton	1	5	24670554	24673448	2894	Y
AT5G66630.1		5	26592648	26595922	3274	FORWARD	other	singleton	1	singleton	1	5	25984314	25987921	3607	Y
AT5G66900.1		5	26714764	26717788	3024	REVERSE	CNL	tandem	2	tandem	2	5	26107346	26110459	3113	Y
AT5G66910.1		5	26718232	26721256	3024	REVERSE	CNL	tandem	2	tandem	2	5	26110784	26113899	3115	Y
